# Supplementary material for: Temperament and Character Traits of Female Eating Disorder Patients with(out) Non-Suicidal Self-Injury
Source: PubMed Central journal article supplement (PMC7230745; doi:10.3390/jcm9041207), 2020-04-22
Supplement: jcm-09-01207-s001.pdf [file jcm-09-01207-s001.pdf]

**Supplementary Table S1.** Number of days individuals engaged in five NSSI behaviours in the last month.

|            | Scratch<br><i>n</i> = 48 |          |                        |          | Bruise<br><i>n</i> = 24 |          |                        |          | Cut<br><i>n</i> = 37  |          |                        |          | Burn<br><i>n</i> = 5 |          |                       |          | Bite<br><i>n</i> = 14 |          |                       |          |
|------------|--------------------------|----------|------------------------|----------|-------------------------|----------|------------------------|----------|-----------------------|----------|------------------------|----------|----------------------|----------|-----------------------|----------|-----------------------|----------|-----------------------|----------|
|            | ED-R<br><i>n</i> = 11    |          | ED-BP<br><i>n</i> = 37 |          | ED-R<br><i>n</i> = 4    |          | ED-BP<br><i>n</i> = 20 |          | ED-R<br><i>n</i> = 10 |          | ED-BP<br><i>n</i> = 27 |          | ED-R<br><i>n</i> = 0 |          | ED-BP<br><i>n</i> = 5 |          | ED-R<br><i>n</i> = 6  |          | ED-BP<br><i>n</i> = 8 |          |
|            | % <sup>a</sup>           | <i>n</i> | % <sup>a</sup>         | <i>n</i> | % <sup>a</sup>          | <i>n</i> | % <sup>a</sup>         | <i>n</i> | % <sup>a</sup>        | <i>n</i> | % <sup>a</sup>         | <i>n</i> | % <sup>a</sup>       | <i>n</i> | % <sup>a</sup>        | <i>n</i> | % <sup>a</sup>        | <i>n</i> | % <sup>a</sup>        | <i>n</i> |
| 1–5 days   | 54.5%                    | 6        | 67.6%                  | 25       | 75%                     | 3        | 75%                    | 15       | 70%                   | 7        | 51.9%                  | 14       | 0                    | 100%     | 5                     | 66.7%    | 4                     | 75%      | 6                     |          |
| 6–10 days  | 27.3%                    | 3        | 8.1%                   | 3        | 0%                      | 0        | 5%                     | 1        | 10%                   | 1        | 22.2%                  | 6        | 0                    | 0%       | 0                     | 16.7%    | 1                     | 12.5%    | 1                     |          |
| 11–15 days | 18.2%                    | 2        | 8.1%                   | 3        | 0%                      | 0        | 15%                    | 3        | 10%                   | 1        | 7.4%                   | 2        | 0                    | 0%       | 0                     | 0%       | 0                     | 12.5%    | 1                     |          |
| >15 days   | 0%                       | 0        | 16.2%                  | 6        | 25%                     | 1        | 5%                     | 1        | 10%                   | 1        | 18.5%                  | 5        | 0                    | 0%       | 0                     | 16.7%    | 1                     | 0%       | 0                     |          |

*Note.* <sup>a</sup> Percentages of NSSI frequency per method within ED category; ED-R = eating disorder of the restrictive type; ED-BP = eating disorder of the bingeing/purging type.
